# Supplementary material for: The role of multipotent cancer associated fibroblasts in hepatocarcinogenesis
Source: PubMed Central journal article supplement (PMC4389787; doi:10.1186/s12885-015-1196-y), 2015-03-27
Supplement: 12885_2015_1196_MOESM1_ESM.pdf [file 12885_2015_1196_MOESM1_ESM.pdf]

**Table S1. List of primers**

| Gene                   | Acc. No.           | Sequence F                    | Sequence R                   | Ref. |
|------------------------|--------------------|-------------------------------|------------------------------|------|
| Reference genes        |                    |                               |                              |      |
| 18S                    | NR_003286.2        | TAACCCGTTGAACCCATT            | CCATCCAATCGGTAGTAGCG         | [1]  |
| ACTB                   | NM_001101.3        | CGCCGCCAGCTCACCATG            | CACGATGGAGGGGAAGACGG         | TS   |
| Cells characterization |                    |                               |                              |      |
| AFP                    | NM_001134          | GCGGCTGACATTATTATCG           | TTGGCACAGATCCTTATGG          | TS   |
| ALB                    | NM_000477.3        | GGCATCCTGATTACTCTGTGCG        | AATTCTGAGGCTCTTCCACAA<br>G   | TS   |
| CD105                  | NM_001114753.<br>1 | CTTCCTCCTCCACTTCTAC           | GGACTTCCTGGTCTTGAG           | TS   |
| CD117                  | NM_000222          | AGGCTCTTCTCAACCATCTG          | ATTCATTCTGCTTATTCTCATT<br>CG | TS   |
| CD11B                  | NM_000632.3        | AGAATCCAGTGTGACATC            | GTTATGCGAGGTCTTGAT           | TS   |
| CD13                   | NM_001150          | TACCATCATCAGCATTAC            | CACCACCATAATCGTTAA           | TS   |
| CD133                  | NM_006017          | CATCTGCTCTCTGCTGAC            | AACTTAATCCAACCTCCAACC        | TS   |
| CD14                   | NM_001040021.<br>2 | TTCACAATCTCTTCCACAA           | CATTTCTTTGACTTCTTCCTT        | TS   |
| CD166                  | NM_001627.2        | GAAGGAGGAGGAATATGGAATC        | GTCAAGTCGGCAAGGTATG          | TS   |
| CD19                   | NM_00178098.1      | GATTCACACCTGACTCTG            | ACACATCCTAAGCAACATT          | TS   |
| CD29                   | NM_002211.3        | GCCTTGGTGTCTGTGCTGAG          | AGTCGTCAACATCCTTCTCCTT<br>AC | TS   |
| CD31                   | NM_000442          | GAGTCCAGCCGCATATCC            | TGACACAATCGTATCTTCCTTC       | TS   |
| CD34                   | NM_001025109       | CTGATACCGAATTGTGACTC          | TTGGGCGTAAGAGATGTC           | TS   |
| CD44                   | NM_000610          | CTCATACCAGCCATCCAATG          | GAGTCCATATCCATCCTTCTTC       | TS   |
| CD45                   | NM_002838.3        | CGGCTGACTTCCAGATATGAC         | GCAGTGGTGTGAGTAGGTAAG        | TS   |
| CD79                   | NM_001783.3        | ATTGTAGCAGCCTCGTTA            | CAGTTGGGAAGAATTTATTATC<br>AC | TS   |
| CD90                   | NM_006288.2        | AGAGACTTGGATGAGGAG            | CTGAGAATGCTGGAGATG           | TS   |
| CK19                   | NM_002276.4        | TGAGTGACATGCGAAGCCAATAT       | GCGACCTCCCGGTTCAAT           | [2]  |
| CK7                    | NM_005556.3        | TGAATGATGAGATCAACTTCCTCA<br>G | TGTCGGAGATCTGGGACTGC         | [2]  |
| EpCAM                  | NM_002354.1        | GAATAATAATCGTCAATGCCAGTG      | CGCTCTCATCGCAGTCAG           | TS   |
| SOX2                   | NM_003106.2        | AGCTACAGCATGATGCAGGA          | GGTCATGGAGTTGTAAGTCA         | [3]  |
| OCT4                   | NM_002701          | AGCGAACCAGTATCGAGAAC          | TTACAGAACCACACTCGGAC         | [3]  |
| Cells differentiation  |                    |                               |                              |      |
| PPARG                  | NM_138712.3        | ACGAAGACATTCCATTCAACAAG       | TCTCCACAGACACGACATTC         | TS   |
| GIP                    | NM_004123.2        | CCCTCAACCTCGAGGCCCA           | CCCGAGCCTCCCTCTGGGTG         | TS   |
| SST                    | NM_001048.3        | CCCAGACTCCGTCAGTTTCT          | AGCCTGGGACAGATCTTCAG         | TS   |

|                         |              |                         |                              |     |
|-------------------------|--------------|-------------------------|------------------------------|-----|
| BGLAP                   | NM_199173.4  | CAGAGTCCAGCAAAGGTG      | AGCCATTGATACAGGTAGC          | TS  |
| IBSP                    | NM_004967.3  | CGAGCCTATGAAGATGAG      | GTGGTGGTAGTAATTCTGA          | TS  |
| OP                      | NM_001040058 | AATGATGAGAGCAATGAG      | GTCTACAACCAGCATATC           | TS  |
| OPG                     | NM_002546    | AATGTGGAATAGATGTTACC    | TCTACCAAGACACTAAGC           | TS  |
| ON                      | NM_003118    | GTATCTGTGGGAGCTAATCCT   | AGAGTCGAAGGTCTTGTGTC         | [4] |
| Tumor promoting factors |              |                         |                              |     |
| FAP                     | NM_004460.2  | TATTCAGAGTAACACAGGATTCA | ACTTCTTGCTTGGAGGATAG         | TS  |
| TGFβ1                   | NM_000660.4  | GCAACAATTCCTGGCGATACC   | CTCCACGGCTCAACCACTG          | TS  |
| CTGF                    | NM_001901.2  | AGACCTGTGCCTGCCATTAC    | TGTGAATCAGTTCAAGTTCCA<br>GTC | TS  |
| ACTA2                   | NM_001141945 | TTGGCTTGGCTTGTCCAGG     | GCTTTAGGGTCGCTGGAG           | TS  |
| VIM                     | NM_003380.3  | AACTTCTCAGCATCACGATGAC  | TTGTAGGAGTGTCCGTTGTTA<br>AG  | TS  |
| CDH1                    | NM_004360.3  | GGAACTATGAAAAGTGGGCTTG  | AAATTGCCAGGCTCAATGAC         | [5] |
| CDH2                    | NM_001792.3  | GACGGTTCGCCATCCAGAC     | TCGATTGGTTTGACCACGG          | [6] |
| COL1                    | NM_000088    | GGCTCCTGCTCCTCTTAG      | GTGGGATGTCTTCGTCTTG          | TS  |

## References

- Schmittgen TD, Zakrajsek BA: **Effect of experimental treatment on housekeeping gene expression: validation by real-time, quantitative RT-PCR.** *J Biochem Biophys Methods* 2000, **46**:69–81.
- Dimmler A, Gerhards R, Betz C, Günther K, Reingruber B, Horbach T, Baumann I, Kirchner T, Hohenberger W, Papadopoulos T: **Transcription of cytokeratins 8, 18, and 19 in bone marrow and limited expression of cytokeratins 7 and 20 by carcinoma cells: inherent limitations for RT-PCR in the detection of isolated tumor cells.** *Lab Investig J Tech Methods Pathol* 2001, **81**:1351–1361.
- Park I-H, Zhao R, West JA, Yabuuchi A, Huo H, Ince TA, Lerou PH, Lensch MW, Daley GQ: **Reprogramming of human somatic cells to pluripotency with defined factors.** *Nature* 2008, **451**:141–146.
- Dass CR, Ek ET, Contreras KG, Choong PF: **A novel orthotopic murine model provides insights into cellular and molecular characteristics contributing to human osteosarcoma.** *Clin Exp Metastasis* 2006, **23**:367–380.
- Lin C-W, Liao M-Y, Lin W-W, Wang Y-P, Lu T-Y, Wu H-C: **Epithelial cell adhesion molecule regulates tumor initiation and tumorigenesis via activating reprogramming factors and epithelial-mesenchymal transition gene expression in colon cancer.** *J Biol Chem* 2012, **287**:39449–39459.

6. Kroepil F, Fluegen G, Totikov Z, Baldus SE, Vay C, Schauer M, Topp SA, Esch JSA, Knoefel WT, Stoecklein NH: **Down-regulation of CDH1 is associated with expression of SNAI1 in colorectal adenomas.** *PLoS One* 2012, **7**:e46665.
